# Supplementary material for: Soluble PD-L1 is associated with local and systemic inflammation markers in primary and secondary brain tumours
Source: PubMed Central journal article supplement — ESMO Open. 2020 Nov 12;5(6):e000863. doi: 10.1136/esmoopen-2020-000863 (PMC7662140; doi:10.1136/esmoopen-2020-000863), 2020-11-12
Supplement: esmoopen-2020-000863supp001.pdf [file esmoopen-2020-000863supp001.pdf]

**Supplementary Tables****Supplementary Table 1. Antibodies used for immunohistochemistry analysis.**

| <b>Marker</b> | <b>Antibody Clone</b>                                                 | <b>Company</b>                            | <b>Dilution</b> |
|---------------|-----------------------------------------------------------------------|-------------------------------------------|-----------------|
| CD3           | Monoclonal rabbit antibody,<br>Clone SP7 / Ref. Nr.<br>RM9107-S1      | Thermo Fisher Scientific,<br>Cheshire, UK | 1:200           |
| CD8           | Monoclonal mouse antibody,<br>anti-Human CD8/ Clone<br>C8/144B/ M7103 | DakoCytomation<br>Glostrup, Denmark       | 1:100           |
| PD-L1         | Monoclonal rabbit antibody,<br>Clone BSR90                            | Nordic BioSite, Täby,<br>Sweden           | 1:100           |
| IDH1 R132H    | Monoclonal mouse antibody,<br>Clone H09                               | Dianova, Hamburg,<br>Germany              | 1:200           |
