# Supplementary figures and images for: Soluble PD-L1 is associated with local and systemic inflammation markers in primary and secondary brain tumours
Source: PubMed Central journal article supplement — ESMO Open. 2020 Nov 12;5(6):e000863. doi: 10.1136/esmoopen-2020-000863 (PMC7662140; doi:10.1136/esmoopen-2020-000863), 2020-11-12

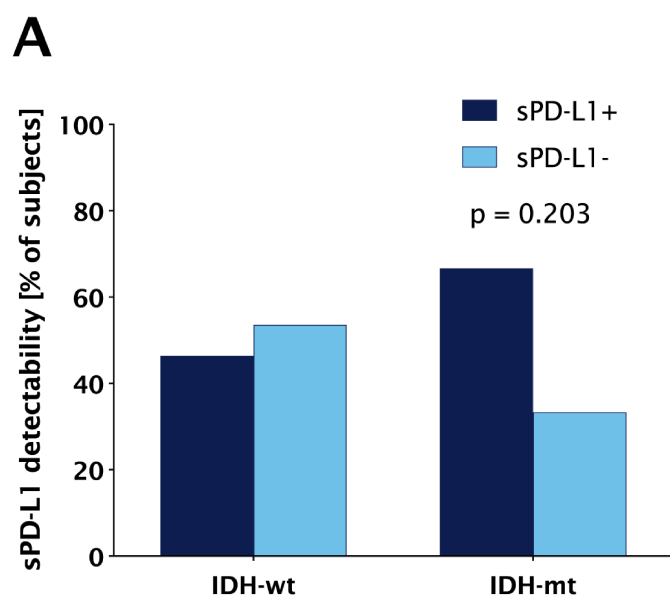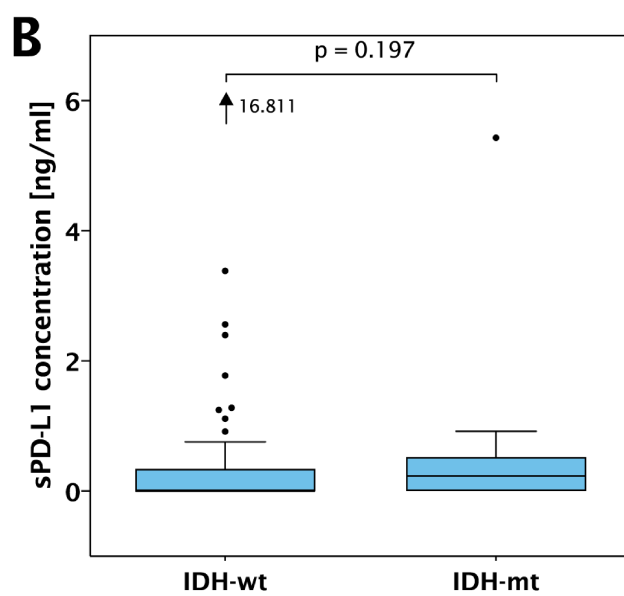

Supplement: esmoopen-2020-000863supp002.pdf [file esmoopen-2020-000863supp002.pdf]

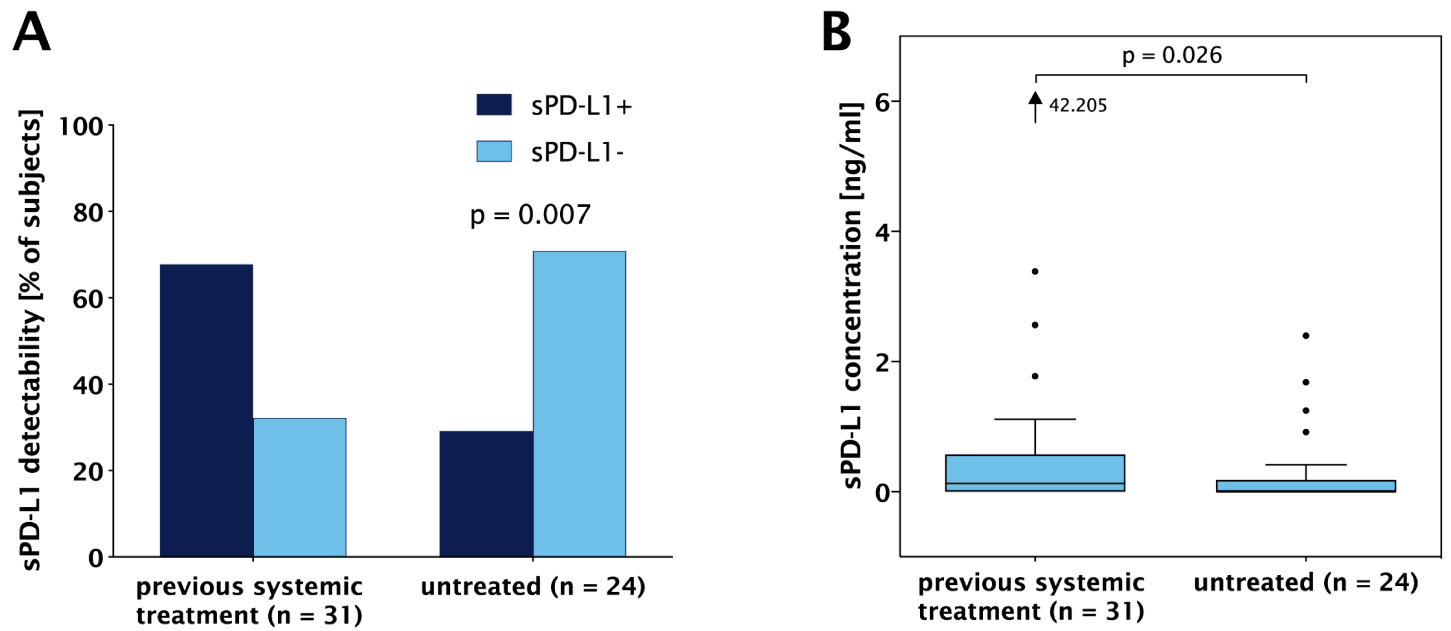

Supplement: esmoopen-2020-000863supp003.pdf [file esmoopen-2020-000863supp003.pdf]

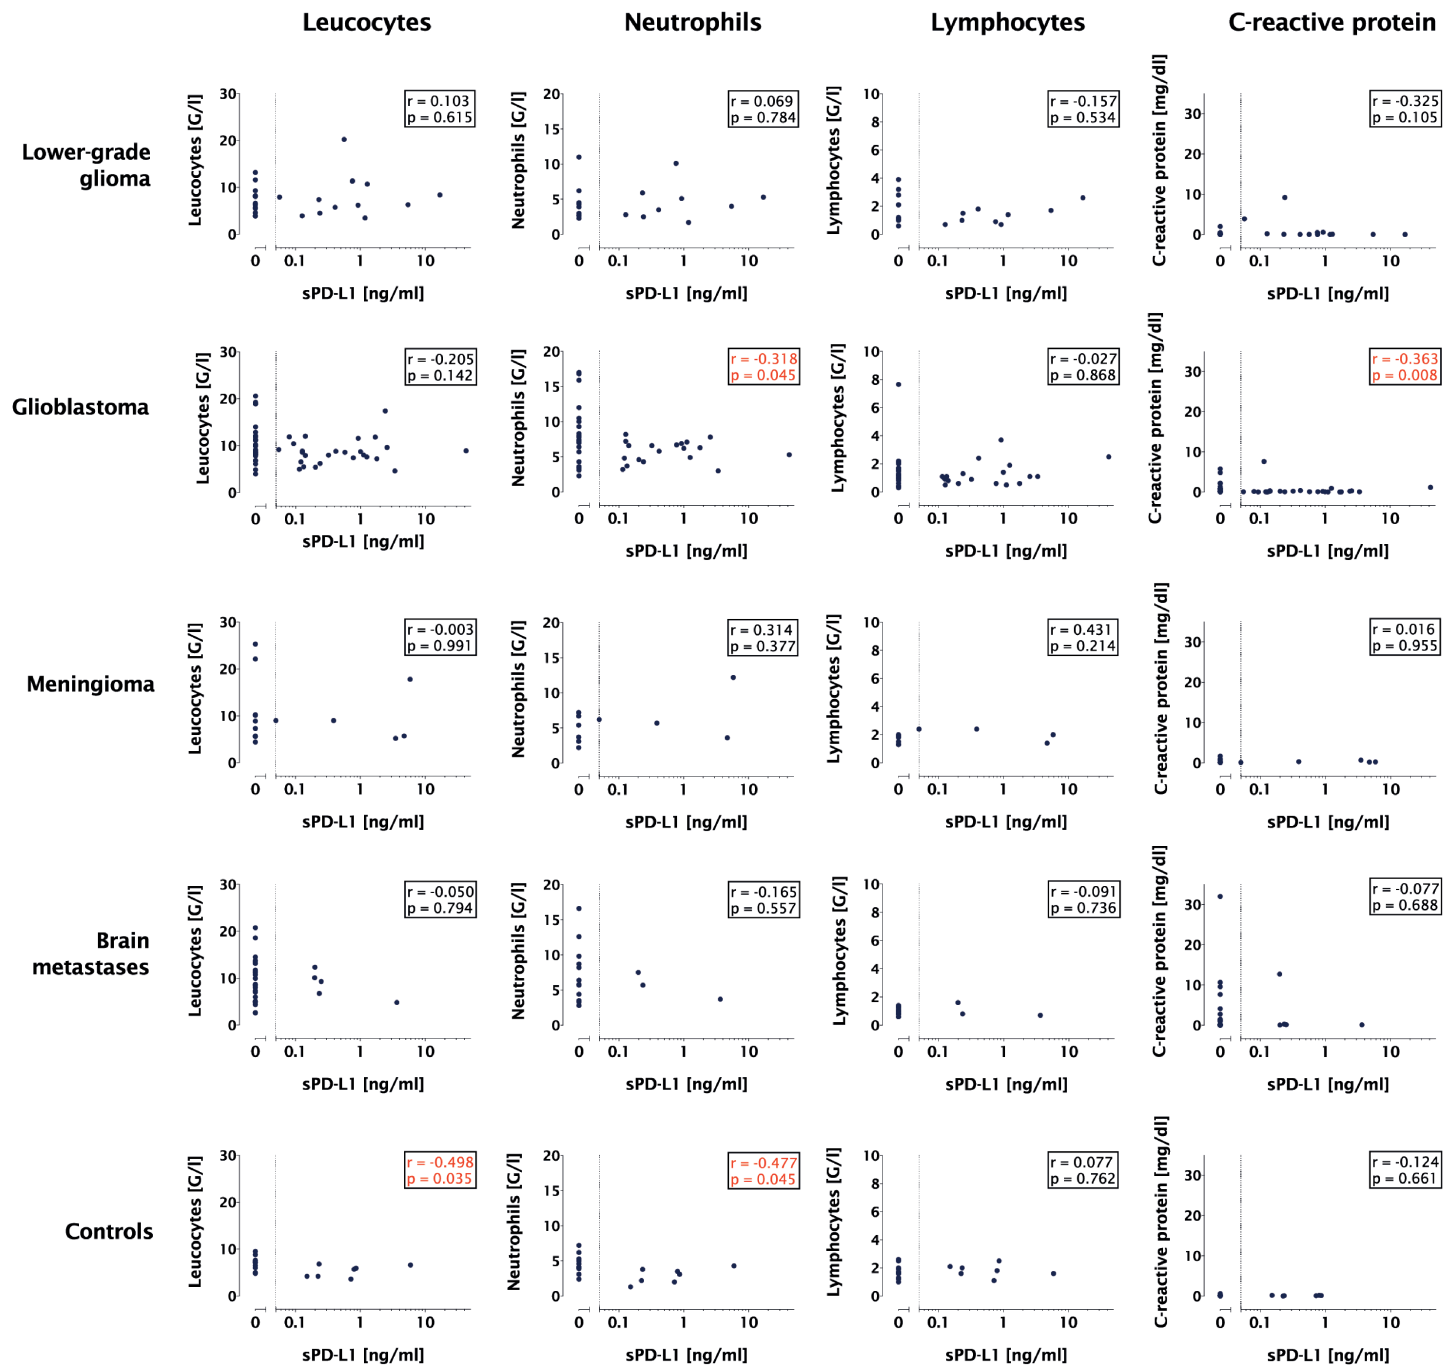

Supplement: esmoopen-2020-000863supp004.pdf [file esmoopen-2020-000863supp004.pdf]

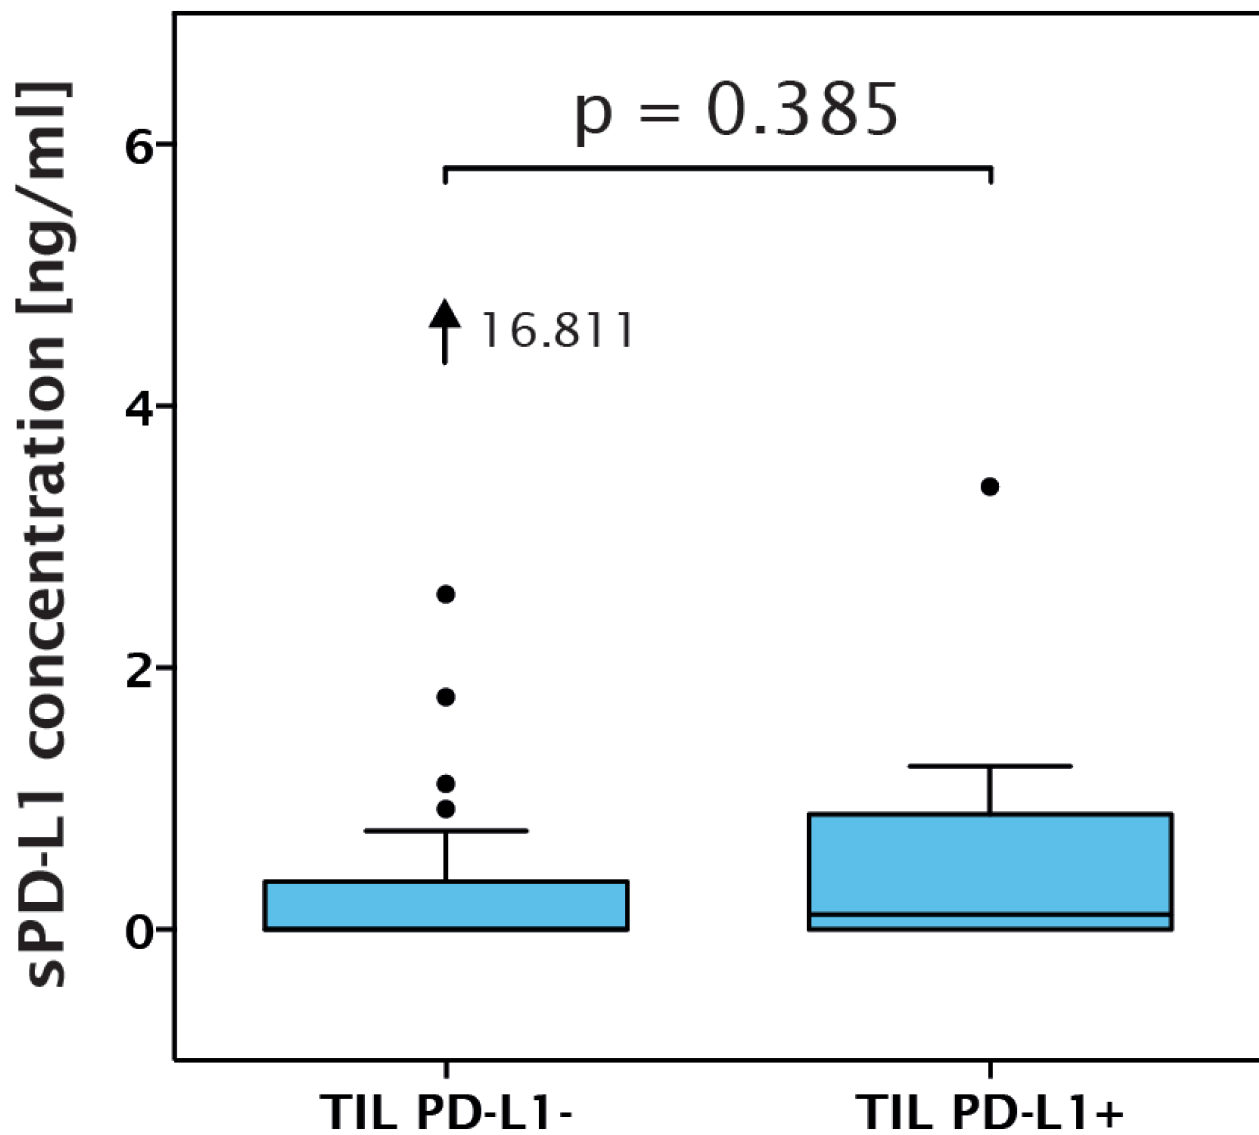

Supplement: esmoopen-2020-000863supp005.pdf [file esmoopen-2020-000863supp005.pdf]

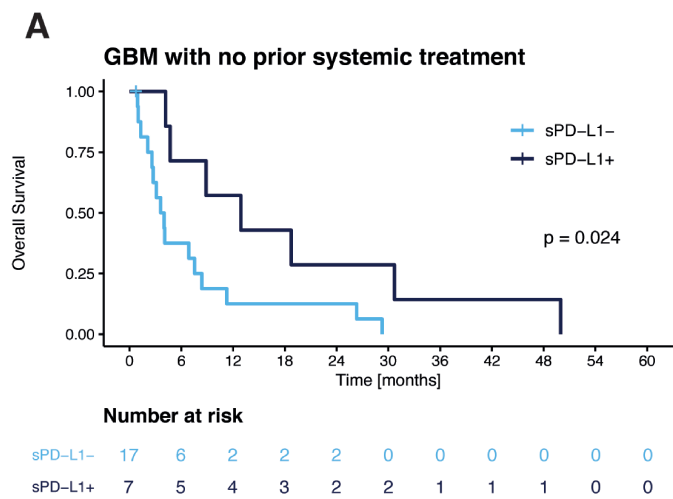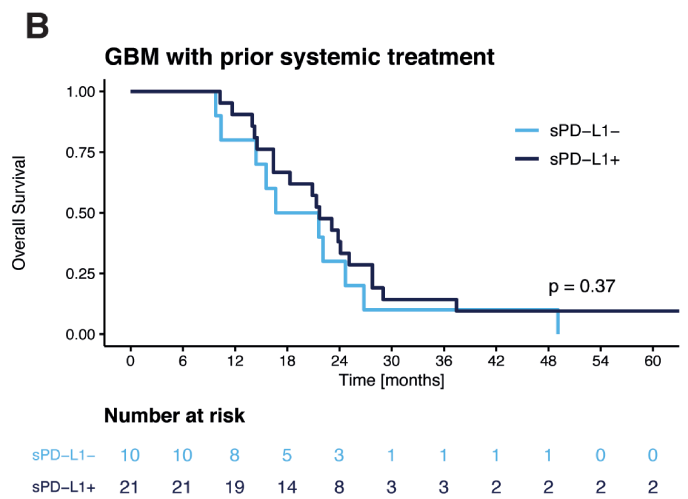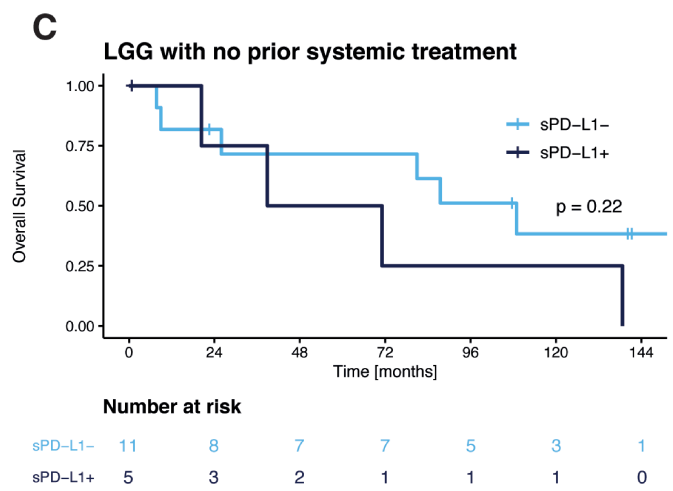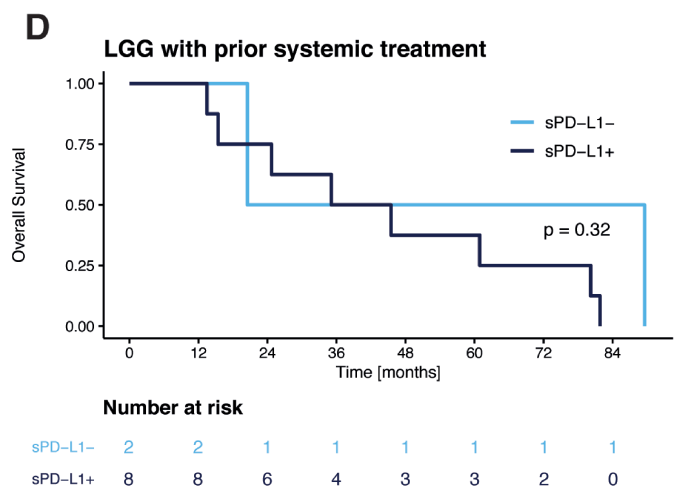

Supplement: esmoopen-2020-000863supp006.pdf [file esmoopen-2020-000863supp006.pdf]
